# Supplementary material for: Regulation of UHRF1 by dual-strand tumor-suppressor microRNA-145 (miR-145-5p and miR-145-3p): inhibition of bladder cancer cell aggressiveness
Source: PubMed Central journal article supplement (PMC5053739; doi:10.18632/oncotarget.8668), 2016-04-09
Supplement: oncotarget-07-28460-s001.pdf [file oncotarget-07-28460-s001.pdf]

## Regulation of *UHRF1* by dual-strand tumor-suppressor *microRNA-145* (*miR-145-5p* and *miR-145-3p*): inhibition of bladder cancer cell aggressiveness

### Supplementary Materials

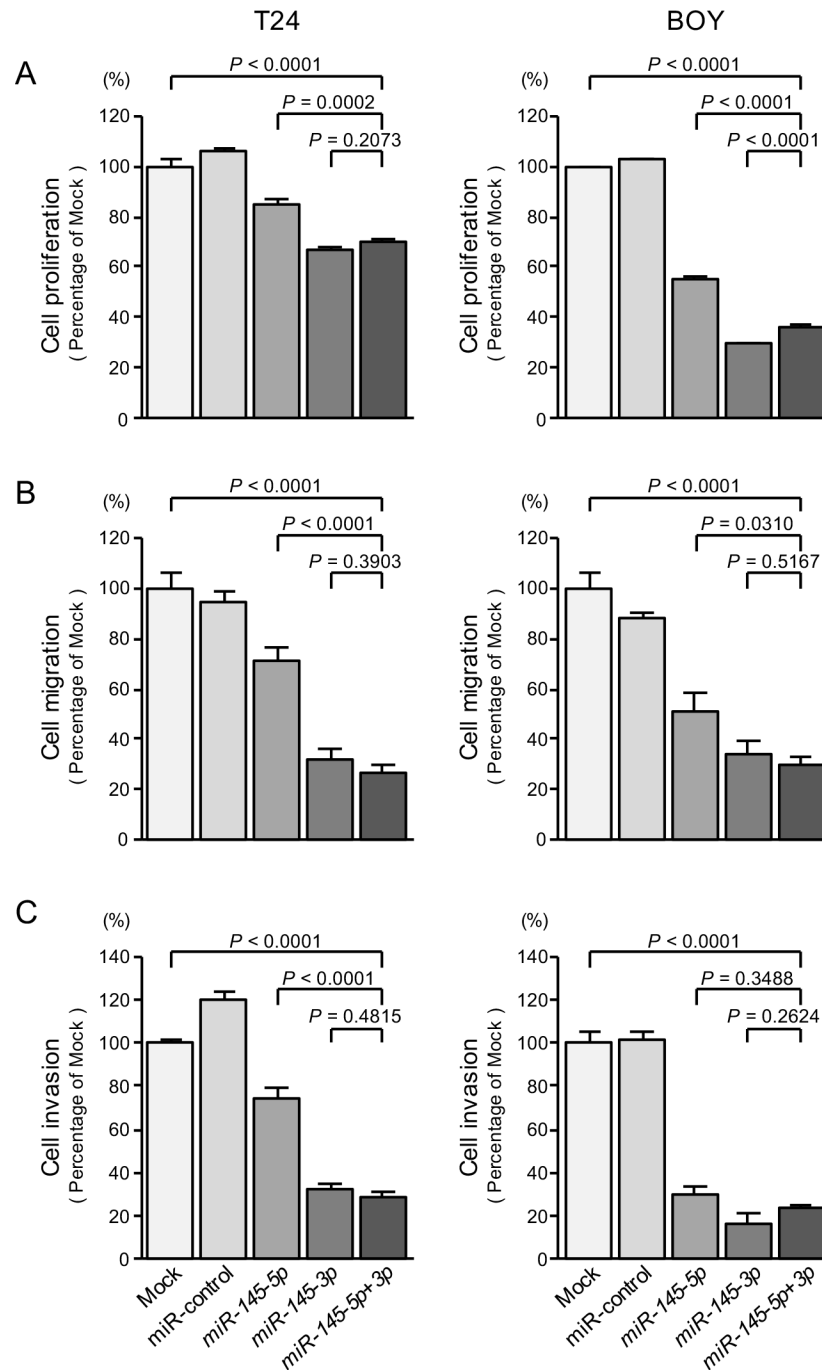

**Supplementary Figure S1: Effects of co-transfection of *miR-145-5p* and *miR-145-3p* on proliferation, migration and invasion assays.** Co-transfection of *miR-145-5p* (10 nM) and *miR-145-3p* (10 nM) did not show synergistic effects on cancer cell aggressiveness compared with *miR-145-5p* or *miR-145-3p* transfection in BC cells.

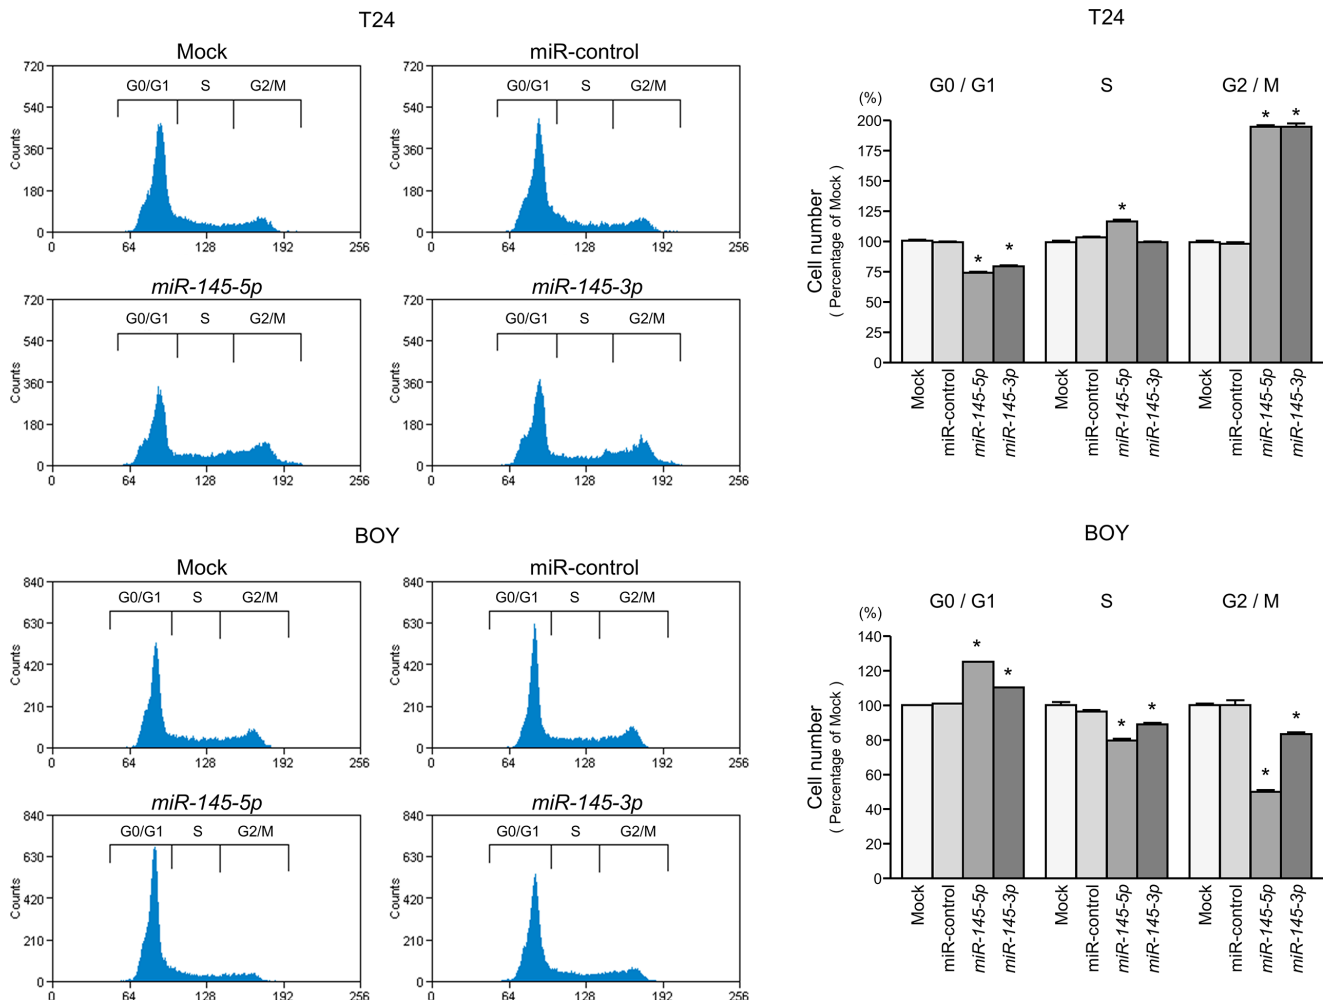

**Supplementary Figure S2: Cell cycle assays by *miR-145-5p* and *miR-145-3p* transfectants in BC cells.** Flow cytometric analysis of cell cycle phase distribution in mock, miR-control, or *miR-145-5p* and *miR-145-3p* transfectants. The bar charts represent the percentage of mock in G0/G1, S, and G2/M phases. \* $P < 0.0001$ .
